# Supplementary material for: High pyridine N-doped porous carbon derived from metal–organic frameworks for boosting potassium-ion storage
Source: Royal Society of Chemistry journal article supplement (doi:10.1039/c8ta06652c), 2018-01-01
Supplement: c8ta06652c1.pdf [file c8ta06652c1.pdf]

## Supporting information for

### High Pyridine N-Doped Porous Carbon Derived from Metal-Organic Frameworks for Boosting Potassium-Ion Storage

Youpeng Li<sup>a,b</sup>, Chenghao Yang<sup>a,b\*</sup>, Fenghua Zheng<sup>a,b</sup>, Xing Ou<sup>a,b</sup>, Qichang Pan<sup>a,b</sup>,  
Yanzhen Liu<sup>a,b</sup>, Gang Wang<sup>a,b</sup>

*a Guangzhou Key Laboratory for Surface Chemistry of Energy Materials, New Energy  
Research Institute, School of Environment and Energy, South China University of  
Technology, Guangzhou 510006, P. R. China*

*b Guangdong Engineering and Technology Research Center for Surface Chemistry of  
Energy Materials, New Energy Research Institute, School of Environment and Energy,  
South China University of Technology, Guangzhou 510006, PR China*

---

\* Corresponding authors. *E-mail* addresses: esyangc@scut.edu.cn (C. Yang)

## Supplementary Figures

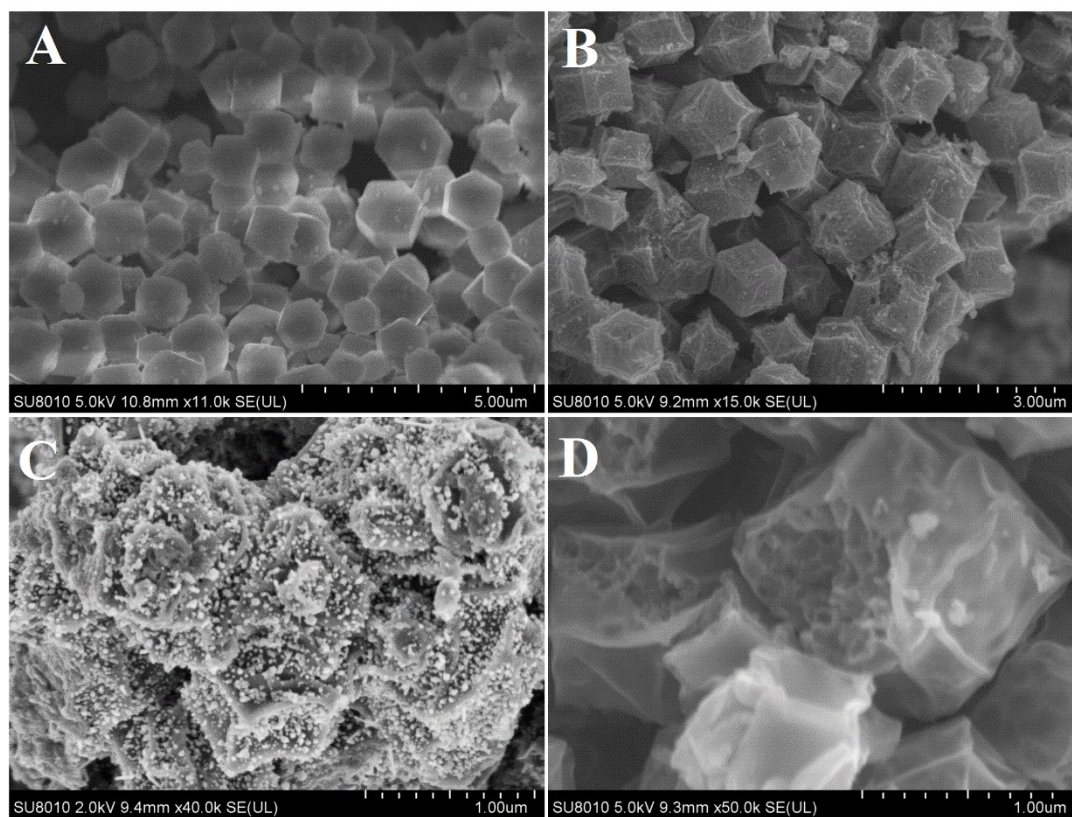

**Figure S1** SEM images of ZIF-67 (A), CNPC-500 (B), CNPC-700 (C) and NCP-600 (D).

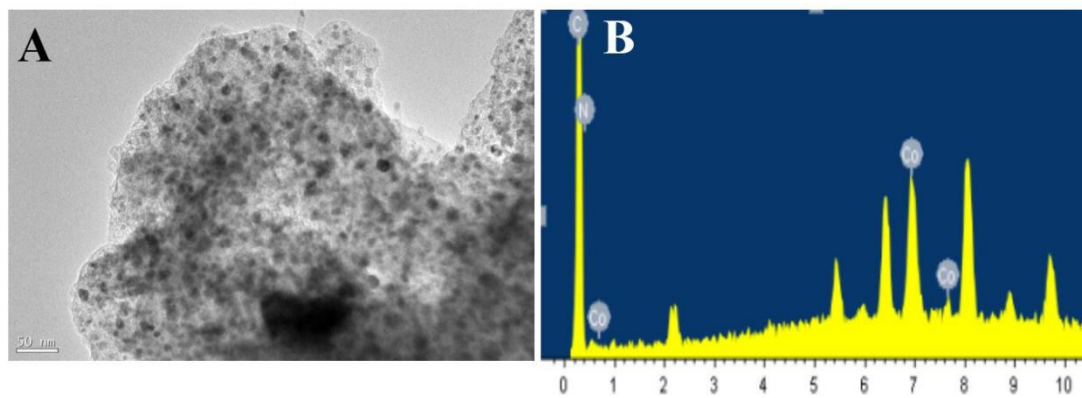

**Figure S2** TEM image (A) and the corresponding EDS mapping (B) of CNPC-600.

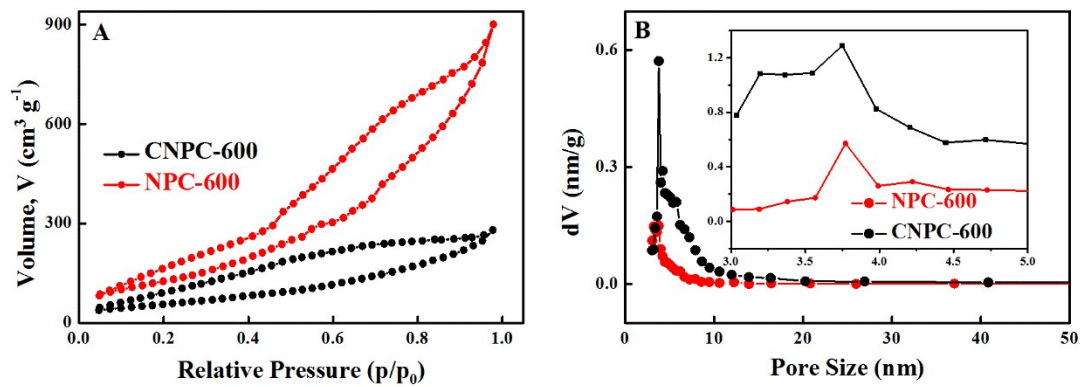

**Figure S3** N<sub>2</sub> adsorption/desorption isotherms (A) and pore size distribution (B) of CNPC-600 and NPC-600, respectively.

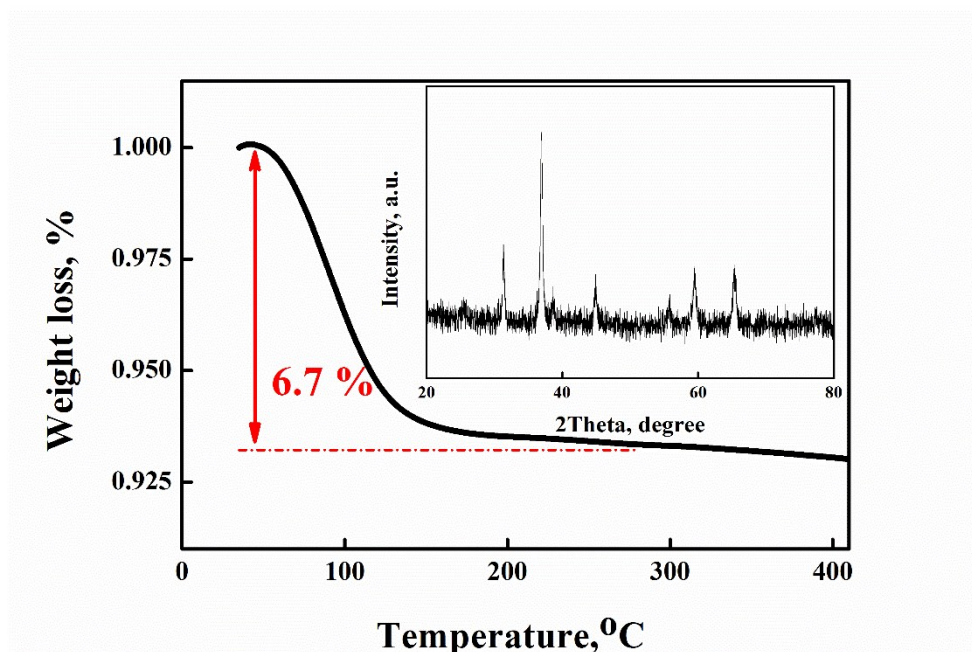

**Figure S4** TGA curves of CNPC-600, the inset pattern is the XRD data of calcined sample.

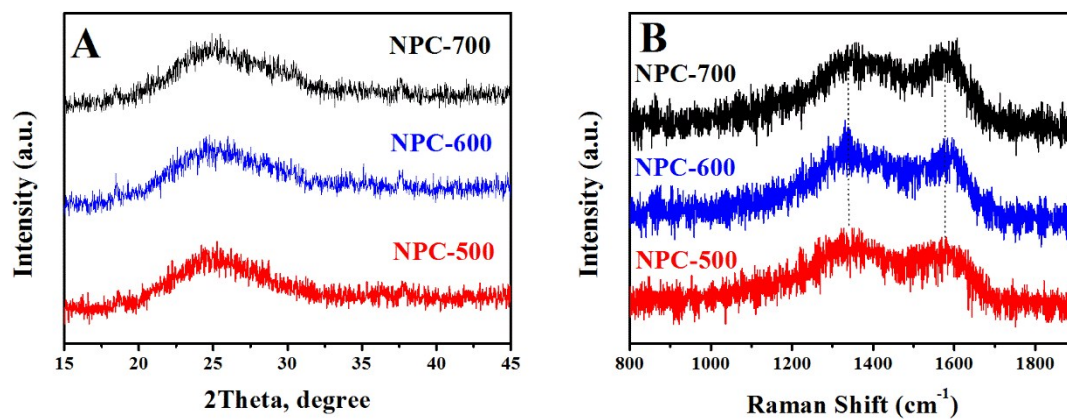

**Figure S5** XRD patterns (A) and Raman spectra (B) of NPC-500, NPC-600 and NPC-700, respectively.

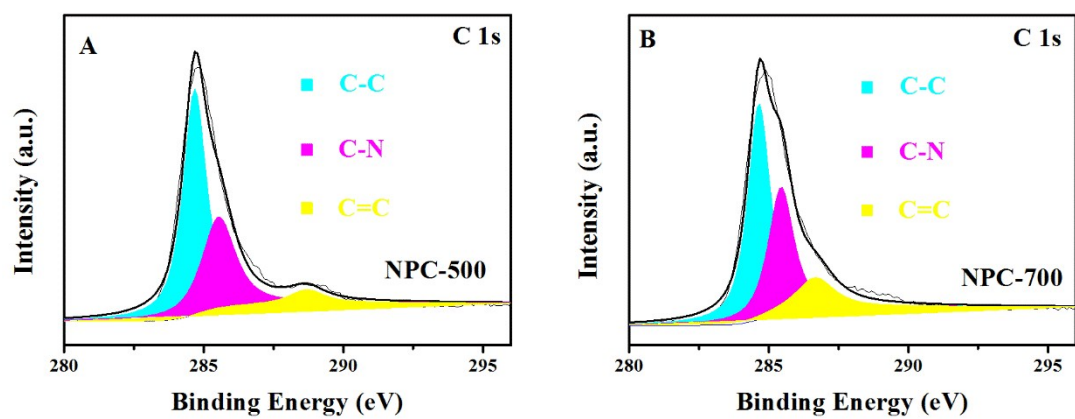

**Figure S6** X-ray photoelectron spectroscopy (XPS) of C 1s for NPC-500 (A) and NPC-700 (B).

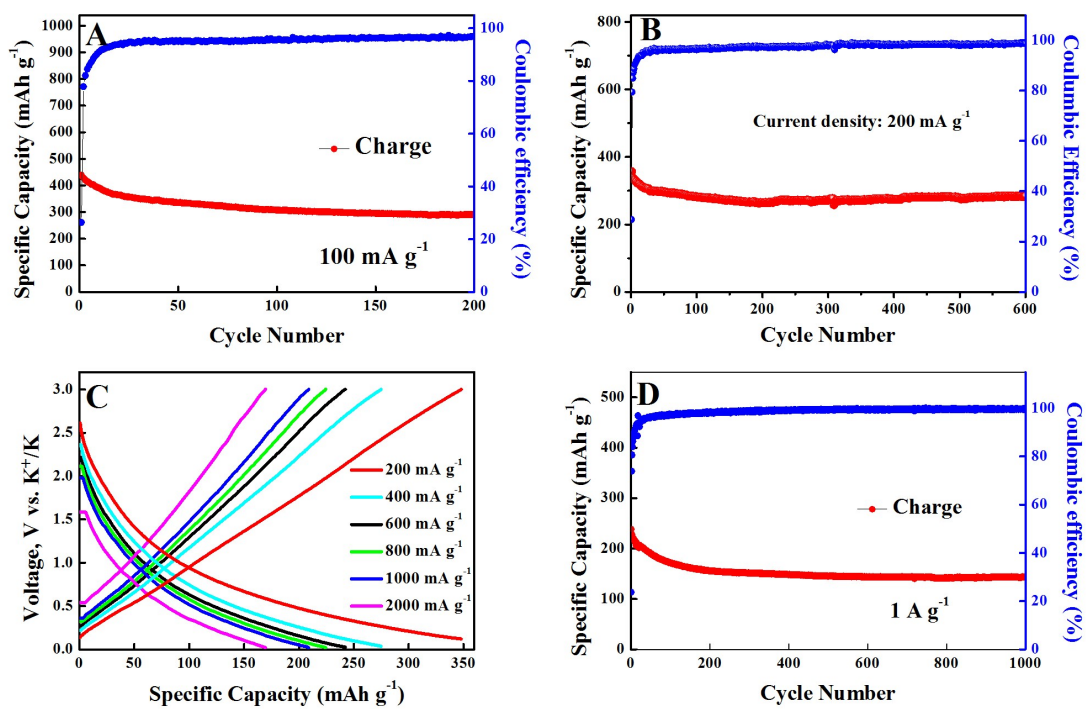

**Figure S7** Cycle performance at 100 mA g<sup>-1</sup> (A), 200 mA g<sup>-1</sup> (B); galvanostatic charge/discharge curves at different rate (C) and cycle ability at 1 A g<sup>-1</sup> (D) of NPC-600.



**Table S1** Detailed Comparison of NPC-600 with other carbon-based anodes in PIBs.

| Types of materials         | Cycling performance                       |                                      | Rate performance                   |                                 | Ref (SI).        |
|----------------------------|-------------------------------------------|--------------------------------------|------------------------------------|---------------------------------|------------------|
|                            | Capacity(mAh g <sup>-1</sup> )<br>/cycles | Current rate<br>(A g <sup>-1</sup> ) | Capacity<br>(mAh g <sup>-1</sup> ) | Current<br>(A g <sup>-1</sup> ) |                  |
| Carbon nanofiber           | 170/1900                                  | 0.2                                  | 110                                | 2                               | [S1]             |
| Hard carbon microspheres   | 216/100                                   | 0.2                                  | 136                                | 1                               | [S2]             |
| Hard-Soft composite carbon | 118/200                                   | 0.278                                | 112                                | 1                               | [S3]             |
| Porous carbon paper        | 270/1200                                  | 0.02                                 | 156                                | 2                               | [S4]             |
| graphene                   | 474/50                                    | 0.05                                 | 160                                | 2                               | [S5]             |
| N-doped carbon nanofibers  | 248/100                                   | 0.025                                | 126                                | 5                               | [S6]             |
| Mesoporous carbon          | 197/200                                   | 0.2                                  | 144                                | 1                               | [S7]             |
| N-doped graphene           | 203/100                                   | 0.1                                  | 203                                | 0.1                             | [S8]             |
| N-rich hard carbon         | 205/200                                   | 0.03                                 | 154                                | 0.3                             | [S9]             |
| <b>NPC-600</b>             | <b>283.3/600</b>                          | <b>0.2</b>                           | <b>186.2</b>                       | <b>2</b>                        | <b>This work</b> |

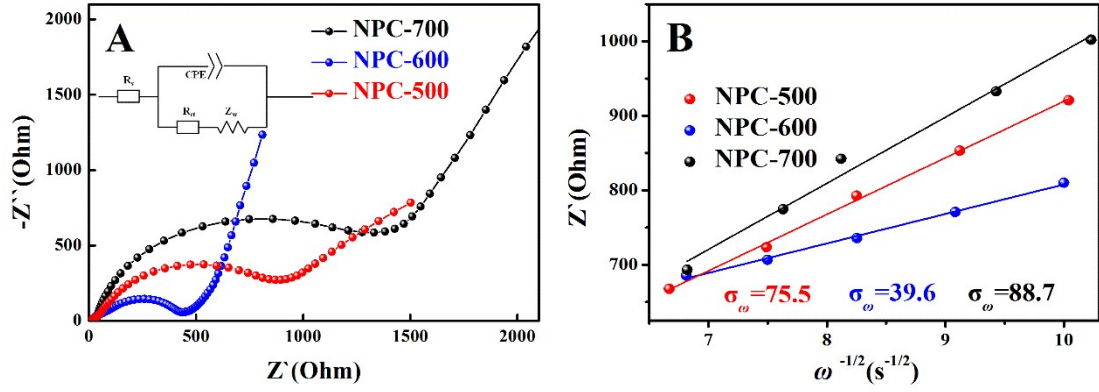

**Figure S8** Electrochemical impedance spectroscopy (EIS) data of NPC-500, NPC-600 and NPC-700.

**Table S2** The simulated results from electrochemical impedance spectra of NPC-500, NPC-600 and NPC-700 samples.

| Sample  | $R_s$ ( $\Omega$ ) | $R_{ct}$ ( $\Omega$ ) | $D_{K^+}$ ( $\text{cm}^2 \text{s}^{-1}$ ) |
|---------|--------------------|-----------------------|-------------------------------------------|
| NPC-500 | 13.45              | 783.47                | $9.54 \times 10^{-14}$                    |
| NPC-600 | 12.43              | 391.65                | $18.19 \times 10^{-14}$                   |
| NPC-700 | 21.57              | 1195.78               | $8.12 \times 10^{-14}$                    |

The K ion diffusion coefficient ( $D_{K^+}$ ) of NPC-500, NPC-600 and NPC-700 can be calculated according to the following equations:<sup>S10</sup>

$$D_{K^+} = \frac{R^2 T^2}{2 A^2 n^4 F^4 C^2 \sigma_w^2} \quad (1)$$

where  $R$  is the gas constant,  $T$  is the absolute temperature,  $A$  is the surface area of the cathode,  $n$  is the number of electrons per molecule during oxidization,  $F$  is the Faraday constant,  $C$  is the concentration of  $K^+$  ion,  $\sigma_w$  is the Warburg factor which is relative with  $Z'$ .

$$Z' = R_s + R_{ct} + \sigma_w \omega^{-1/2} \quad (2)$$

$R_s$  is the resistance of the electrolyte and electrode material,  $R_{ct}$  is the charge transfer resistance and  $\omega$  is the angular frequency in the low frequency region.

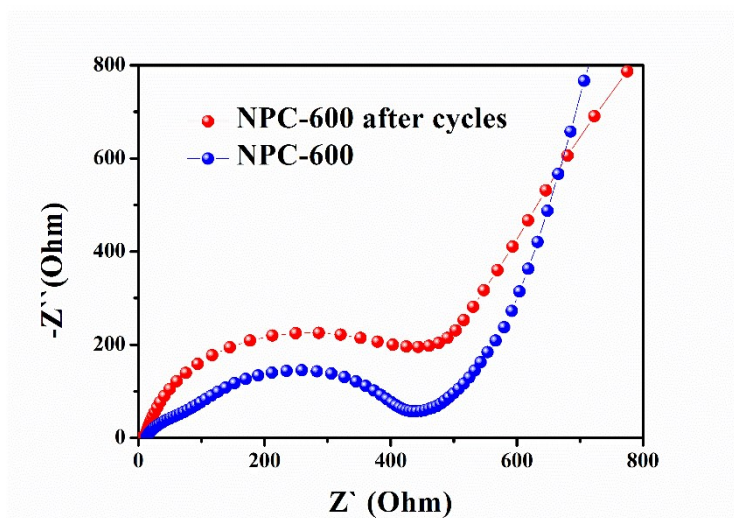

**Figure S9** Electrochemical impedance spectroscopy (EIS) data of NPC-600 and NPC-600 after cycles.

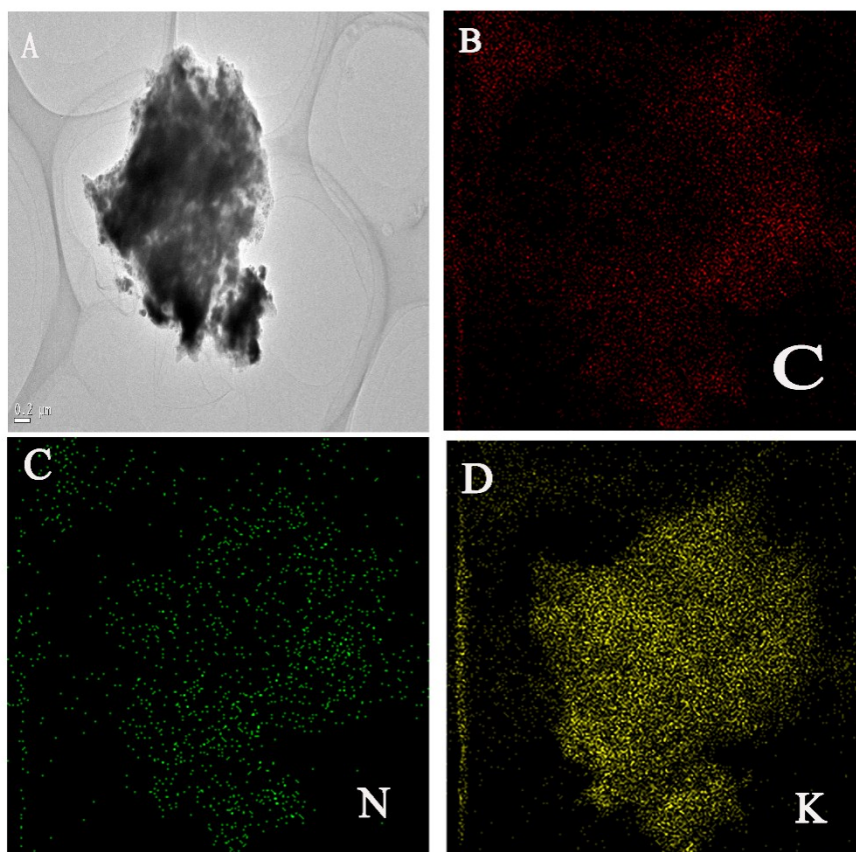

**Figure S10** TEM image (A) and EDS mapping (B-D) at the fully potassiation state of NPC-600.

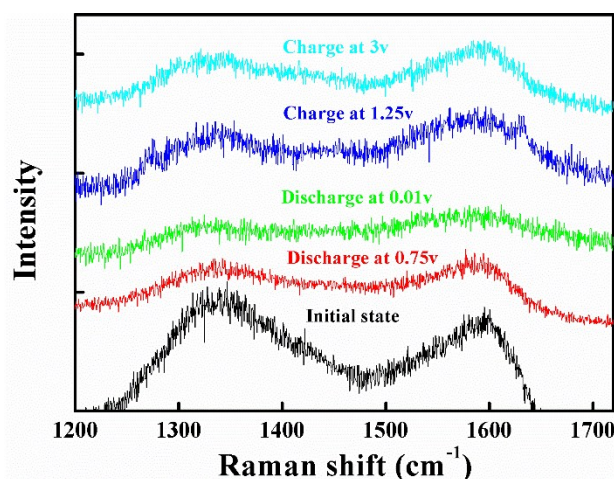

**Figure S11** *Ex-situ* Raman spectra of NPC-600 at different charge/discharge states.

**Table S3** The  $I_D/I_G$  values of NPC-600 at different charge-discharge states.

| State               | $I_D/I_G$ |
|---------------------|-----------|
| Initial state       | 1.02      |
| Discharge at 0.75 V | 0.98      |
| Discharge at 0.01 V | 0.91      |
| charge at 1.25 V    | 0.96      |
| charge at 3 V       | 0.99      |

## Reference

[S1] R. A. Adams, J. M. Syu, Y. Zhao, C. T. Lo, A. Varma and V. G. Pol, *ACS Appl. Mater. Interfaces.*, 2017, **9**, 17872-17881.

[S2] Z. Jian, Z. Xing, C. Bommier, Z. Li and X. Ji, *Adv. Energy Mater.*, 2016, **6**, 1501874

[S3] Z. Jian, S. Hwang, Z. Li, A. S. Hernandez, X. Wang, Z. Xing, D. Su and X. Ji, *Adv. Funct. Mater.*, 2017, **27**, 1700324

- [S4] M. Huang, K. Mi, J. Zhang, H. Liu, T. Yu, A. Yuan, Q. Kong and S. Xiong, *J. Mater. Chem. A.*, 2017, **5**, 266-274.
- [S5] G. Ma, K. Huang, J.-S. Ma, Z. Ju, Z. Xing and Q.-c. Zhuang, *J. Mater. Chem. A.*, 2017, **5**, 7854-7861.
- [S6] Y. Xu, C. Zhang, M. Zhou, Q. Fu, C. Zhao, M. Wu and Y. Lei, *Nat. commun.*, 2018, **9**, 1720.
- [S7] W. Wang, J. Zhou, Z. Wang, L. Zhao, P. Li, Y. Yang, C. Yang, H. Huang and S. Guo, *Adv. Energy Mater.*, 2018, **8**, 1701648.
- [S8] K. Share, A. P. Cohn, R. Carter, B. Rogers and C. L. Pint, *ACS Nano.*, 2016, **10**, 9738–9744.
- [S9] C. Chen, Z. Wang, B. Zhang, L. Miao, J. Cai, L. Peng, Y. Huang, J. Jiang, Y. Huang, L. Zhang and J. Xie, *Energy Storage Mater.*, 2017, **8**, 161-168
- [S10] N. Wu, W. Du, X. Gao, L. Zhao, G. Liu, X. Liu, H. Wu and Y. B. He, *Nanoscale.*, 2018, **10**, 11460-11466.
